# Supplementary material
Source: publisher figshare collection journal article supplement (https://aacr.figshare.com/articles/dataset/_/22490759)
Supplement: Supplementary file 1 [file 39942392]

| Patient: | Variant or Mutant:   |
|----------|----------------------|
| 1        | ERBB2 P1170A         |
| 2        | ERRB2 I655V P1170A   |
| 3        | ERBB2 WILD TYPE      |
| 4        | ERBB2 P1170A         |
| 5        | ERBB2 P1170A         |
| 6        | ERBB2 P378S, P1170A  |
| 7        | ERBB2 G660D P1170A   |
| 8        | ERBB2 P1170A         |
| 9        | ERBB2 WILD TYPE      |
| 10       | ERBB2 L1061P, P1170A |
| 11       | ERBB2 I655V, P1170A  |
| 12       | ERBB2 I655V, P1170A  |

**Supplemental Fig. 3. ERB-B-2 Status of Patients.** ERBB2 (HER2) status for each patient (see Fig. 1) is listed. No comparison to patient normal tissue was performed.
